# Supplementary material
Source: Springer Nature journal article supplement (https://www.springermedizin.de/resource/supplementary/12943_2013_1476_MOESM3_ESM.pdf/9552932)

A

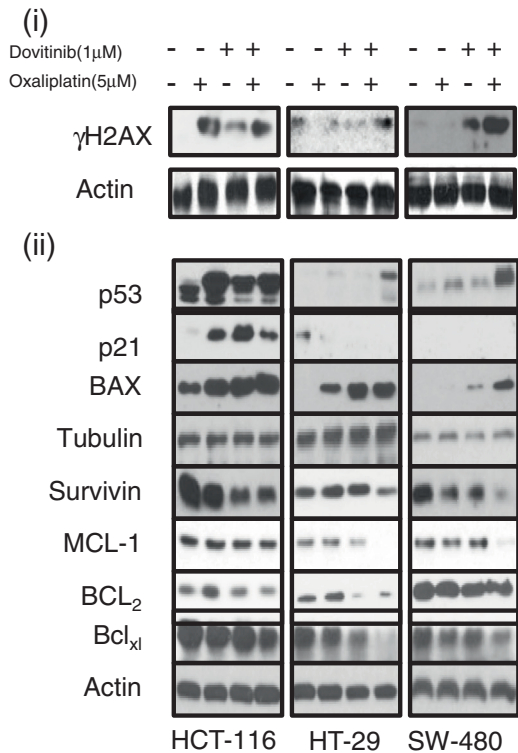

(iii)

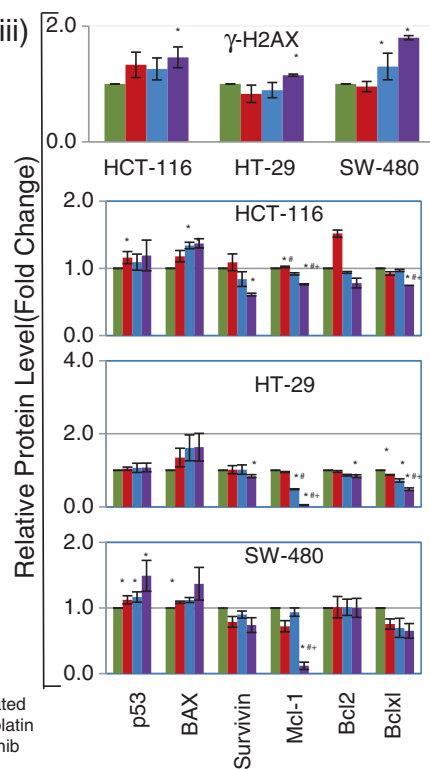

## B:Apoptosis/ Annexin V Assay

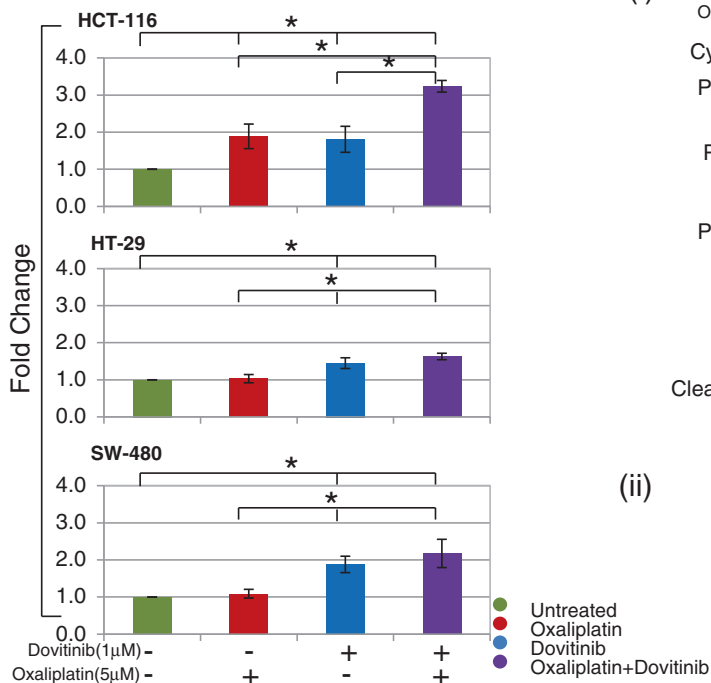

C(i)

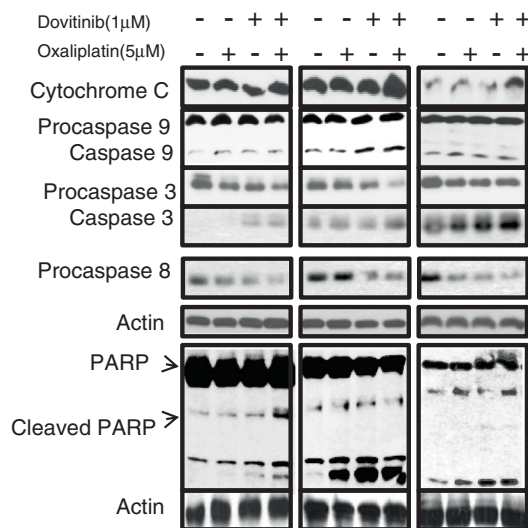

(ii)

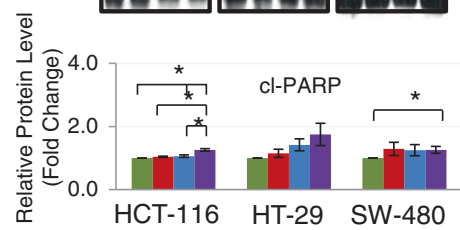

Supplement: MOESM3 [file 9552932]
